# Supplementary material for: Thiol modifier effects of diphenyl diselenides: insight from experiment and DFT calculations
Source: Royal Society of Chemistry journal article supplement (doi:10.1039/d2nj05976b), 2023-01-01
Supplement: d2nj05976b1.pdf [file d2nj05976b1.pdf]

## ***SUPPORTING INFORMATION***

### **Thiol modifier effects of diphenyl diselenides: insight from experiment and DFT calculations**

Pablo A. Nogara,<sup>a,b</sup> Cláudia S. Oliveira,<sup>c,d</sup> Andrea Madabeni,<sup>e</sup> Marco Bortoli,<sup>f</sup> João Batista T.  
Rocha,<sup>a</sup> and Laura Orian<sup>e\*</sup>

<sup>a</sup> Departamento de Bioquímica e Biologia Molecular, Centro de Ciências Naturais e Exatas, Universidade Federal de Santa Maria (UFSM), Av. Roraima 1000, 97105-900 Santa Maria, RS, Brazil;

<sup>b</sup> Instituto Federal de Educação, Ciência e Tecnologia Sul-rio-grandense (IFSul), Av. Leonel de Moura Brizola, 2501, 96418-400, Bagé, RS, Brazil;

<sup>c</sup> Instituto de Pesquisa Pelé Pequeno Príncipe (IPPPP), Av. Silva Jardim, 1632, 80250-060, Curitiba, PR, Brazil;

<sup>d</sup> Faculdades Pequeno Príncipe, Av. Iguaçu, 333, 80230-020, Curitiba, PR, Brazil;

<sup>e</sup> Dipartimento di Scienze Chimiche, Università degli Studi di Padova, Via Marzolo 1, 35131, Padova, Italy.

<sup>f</sup> Department of Chemistry and Hylleraas Centre for Quantum Molecular Sciences, University of Oslo, P.O. Box 1033, Blindern, 0315 Oslo, Norway

\*Corresponding author e-mail: [laura.orian@unipd.it](mailto:laura.orian@unipd.it) (L.O.).

A) DTT reduced, 1 mM.

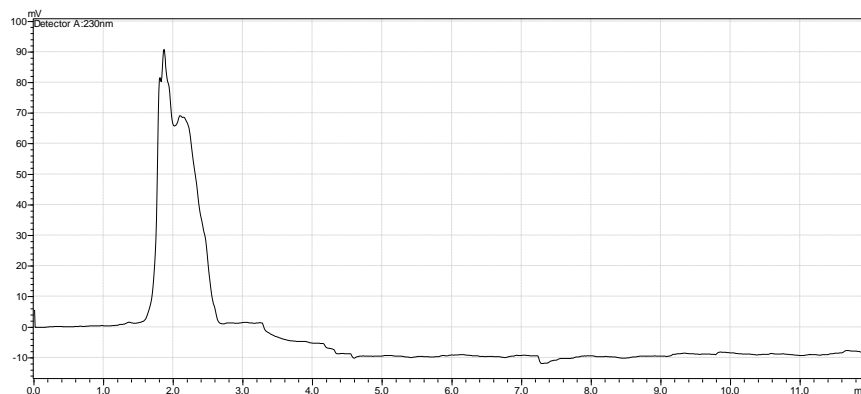

Retention time: 1.860.

Retention time: 2.094.

B) DTT oxidized, 1 mM.

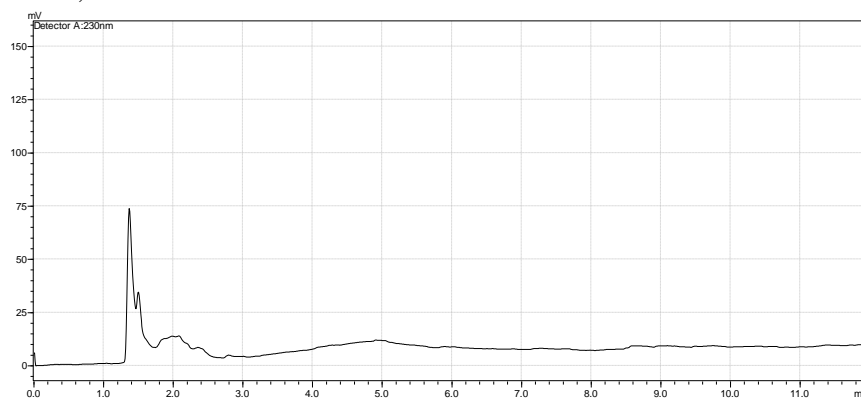

Retention time: 1.492.

Retention time: 1.981.

Retention time: 2.076.

C) (PhSe)<sub>2</sub> (50 μM) + NaBH<sub>4</sub> (250 μM)

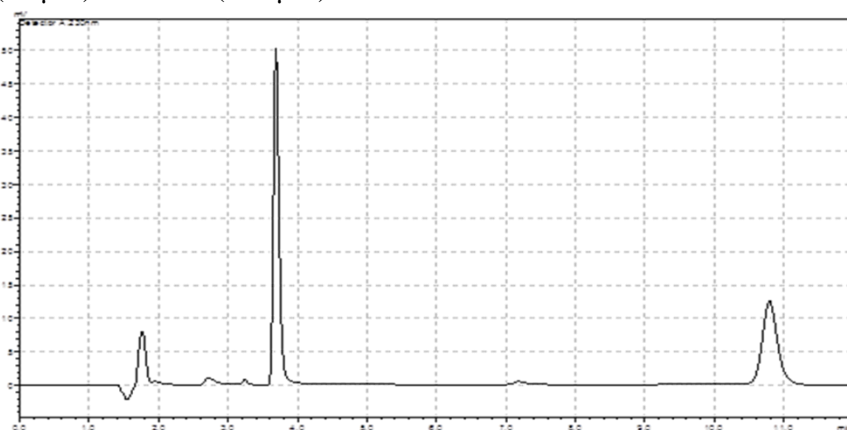

Retention time: 10.913 min: (PhSe).

Retention time: 3.758 min: putative PhSeH.

**Figure S1.** Chromatographic detection of reduced (DTT-(SH)<sub>2</sub>) (A), oxidized DTT (DTT-(SS)) (B), and the reduction of (PhSe)<sub>2</sub> with NaBH<sub>4</sub> (C).

2. Cartesian coordinates (Å), energies (a.u.) and imaginary frequencies (cm<sup>-1</sup>) of the optimized structures. Level of theory: (COSMO)-ZORA-OLYP/TZ2P.

**Gas phase**

**MeS<sup>-</sup>**

E = -0.86001897  
 G = -0.84881110  
 N<sub>imag</sub> = not present.  
 S -9.625538 4.045012 -3.917616  
 C -7.817038 3.906355 -3.664923  
 H -7.252587 4.630108 -4.277113  
 H -7.526213 4.088024 -2.616288  
 H -7.433484 2.905971 -3.928231

**PhSeSePh**

E = -5.31483108  
 G = -5.17795782  
 N<sub>imag</sub> = not present.  
 Se -11.565199 1.683193 0.094184  
 C -13.418198 1.210710 -0.231276  
 C -14.385441 2.202179 -0.430966  
 C -15.721263 1.844792 -0.606420  
 C -16.100217 0.501539 -0.572760  
 C -15.137754 -0.486107 -0.366289  
 C -13.797069 -0.135804 -0.199545  
 H -14.094305 3.248181 -0.448635  
 H -16.468848 2.618984 -0.762573  
 H -17.143640 0.226646 -0.705489  
 H -15.426896 -1.534073 -0.339182  
 H -13.047224 -0.906446 -0.047174  
 Se -10.758095 2.259078 -2.045624  
 C -10.257228 0.551675 -2.818557  
 C -9.058526 -0.073089 -2.456241  
 C -8.686747 -1.270423 -3.065574  
 C -9.501064 -1.844125 -4.043670  
 C -10.692119 -1.218218 -4.409921  
 C -11.074616 -0.023841 -3.797564  
 H -8.419448 0.375783 -1.701732  
 H -7.754745 -1.752484 -2.779871  
 H -9.206082 -2.775805 -4.520009  
 H -11.330329 -1.660345 -5.171363  
 H -12.005947 0.458901 -4.078451

**PhSe<sup>-</sup>**

E = -2.69919684  
 G = -2.64342424  
 N<sub>imag</sub> = not present.  
 Se -11.554931 1.699855 0.043949  
 C -13.371053 1.220919 -0.202444  
 C -14.385129 2.189908 -0.416908  
 C -15.719606 1.837373 -0.601431  
 C -16.121851 0.495967 -0.582252  
 C -15.140609 -0.480705 -0.370684  
 C -13.805696 -0.129710 -0.186033  
 H -14.097725 3.238598 -0.436042  
 H -16.460227 2.622229 -0.763407  
 H -17.164928 0.221016 -0.727313  
 H -15.421919 -1.534842 -0.349854  
 H -13.062387 -0.906816 -0.023722

**MeSSePh**

E = -3.50684983  
 G = -3.41594105  
 N<sub>imag</sub> = not present.  
 Se -10.047850 2.519513 -2.087120  
 C -9.961380 0.867865 -3.115250  
 C -9.396790 -0.245755 -2.485373  
 C -9.381523 -1.479588 -3.138245  
 C -9.907012 -1.601115 -4.423699  
 C -10.458038 -0.482784 -5.052036  
 C -10.496543 0.748451 -4.399587  
 H -8.962478 -0.154860 -1.492934  
 H -8.942165 -2.341998 -2.642420  
 H -9.884920 -2.559909 -4.935138

H -10.871619 -0.569197 -6.054233  
 H -10.934621 1.611888 -4.890528  
 S -9.718821 4.099754 -3.568718  
 C -7.907366 4.203629 -3.742929  
 H -7.730489 5.038210 -4.430021  
 H -7.432789 4.418188 -2.783748  
 H -7.500695 3.288209 -4.176824

**MePhSeSePhMe**

E = -6.49076445  
 G = -6.30924858  
 N<sub>imag</sub> = not present.  
 Se -11.585888 1.758808 -0.005892  
 C -13.439165 1.266125 -0.275771  
 C -14.435646 2.246962 -0.339969  
 C -15.771337 1.879426 -0.472435  
 C -16.154045 0.531684 -0.540951  
 C -15.147054 -0.437672 -0.468839  
 C -13.804680 -0.081368 -0.339101  
 C -17.602729 0.148389 -0.702492  
 H -14.166333 3.297619 -0.283580  
 H -16.531107 2.657246 -0.518027  
 H -15.411492 -1.492048 -0.513687  
 H -13.043057 -0.853712 -0.285561  
 H -18.243461 0.709936 -0.014390  
 H -17.760555 -0.917608 -0.519734  
 H -17.954632 0.366372 -1.718727  
 Se -10.814308 2.257045 -2.182667  
 C -10.269231 0.536226 -2.884240  
 C -9.062309 -0.054512 -2.491881  
 C -8.661441 -1.263557 -3.051267  
 C -9.439098 -1.912849 -4.022252  
 C -10.639779 -1.307355 -4.408395  
 C -11.057363 -0.100082 -3.846794  
 C -8.980274 -3.211067 -4.635391  
 H -8.437351 0.430699 -1.747897  
 H -7.721133 -1.707750 -2.730405  
 H -11.267309 -1.786106 -5.157123  
 H -11.998668 0.343704 -4.157731  
 H -9.762219 -3.665495 -5.249051  
 H -8.689019 -3.934548 -3.866126  
 H -8.103626 -3.054342 -5.276144

**MePhSe<sup>-</sup>**

E = -3.28515938  
 G = -3.20603989  
 N<sub>imag</sub> = not present.  
 Se -11.565779 1.769494 -0.076885  
 C -13.387583 1.279355 -0.255742  
 C -14.432186 2.236647 -0.283646  
 C -15.769944 1.873778 -0.415703  
 C -16.168527 0.532704 -0.529100  
 C -15.144302 -0.426730 -0.497545  
 C -13.804654 -0.070717 -0.365798  
 C -17.614105 0.146484 -0.718511  
 H -14.170060 3.288344 -0.194198  
 H -16.528291 2.659127 -0.429436  
 H -15.401305 -1.484940 -0.576708  
 H -13.045067 -0.848714 -0.341408  
 H -18.290918 0.868582 -0.245241  
 H -17.830085 -0.838785 -0.286851  
 H -17.898376 0.095533 -1.782384

**MeSSePhMe**

E = -4.09461185  
 G = -3.98235972  
 N<sub>imag</sub> = not present.  
 Se -10.221607 2.593046 -2.222761  
 C -10.065534 0.909367 -3.181365  
 C -9.303389 -0.113795 -2.614697  
 C -9.238978 -1.363950 -3.233982

|   |            |           |           |
|---|------------|-----------|-----------|
| C | -9.909941  | -1.616166 | -4.434280 |
| C | -10.663007 | -0.571711 | -4.993439 |
| C | -10.752118 | 0.671412  | -4.376154 |
| C | -9.827690  | -2.957575 | -5.116906 |
| H | -8.755615  | 0.058424  | -1.692055 |
| H | -8.642760  | -2.149371 | -2.774503 |
| H | -11.201537 | -0.736757 | -5.924715 |
| H | -11.352529 | 1.456649  | -4.825667 |
| H | -9.325475  | -2.876475 | -6.088513 |
| H | -10.825885 | -3.368440 | -5.306240 |
| H | -9.274167  | -3.682654 | -4.515038 |
| S | -9.621994  | 4.098262  | -3.708272 |
| C | -7.801107  | 4.115915  | -3.646290 |
| H | -7.494998  | 4.909007  | -4.337211 |
| H | -7.443812  | 4.353771  | -2.642572 |
| H | -7.386289  | 3.164915  | -3.986198 |

**MeOPhSeSePhOMe**

E = -6.92793242

G = -6.73652449

N<sub>imag</sub> = not present.

|    |            |           |           |
|----|------------|-----------|-----------|
| Se | -11.600005 | 1.667341  | 0.029350  |
| C  | -13.453826 | 1.203826  | -0.243851 |
| C  | -14.443587 | 2.197331  | -0.291929 |
| C  | -15.780896 | 1.856959  | -0.424238 |
| C  | -16.164700 | 0.508302  | -0.507378 |
| C  | -15.184482 | -0.490623 | -0.457270 |
| C  | -13.840460 | -0.135421 | -0.328131 |
| H  | -14.163072 | 3.244226  | -0.223586 |
| H  | -16.550274 | 2.623105  | -0.460122 |
| H  | -15.446563 | -1.540598 | -0.516387 |
| H  | -13.088634 | -0.918364 | -0.291515 |
| O  | -17.505287 | 0.287532  | -0.631333 |
| C  | -17.975520 | -1.053266 | -0.713716 |
| H  | -19.060808 | -0.978699 | -0.802663 |
| H  | -17.725863 | -1.625899 | 0.188451  |
| H  | -17.575860 | -1.568941 | -1.596112 |
| Se | -10.806975 | 2.213183  | -2.138108 |
| C  | -10.247672 | 0.520289  | -2.878534 |
| C  | -9.002663  | -0.037084 | -2.549235 |
| C  | -8.581433  | -1.220998 | -3.134359 |
| C  | -9.394080  | -1.876218 | -4.074508 |
| C  | -10.636377 | -1.325815 | -4.412615 |
| C  | -11.053563 | -0.137100 | -3.810328 |
| H  | -8.359417  | 0.461359  | -1.830140 |
| H  | -7.618001  | -1.655368 | -2.882617 |
| H  | -11.287134 | -1.804859 | -5.134863 |
| H  | -12.020934 | 0.278647  | -4.076815 |
| O  | -8.878948  | -3.028795 | -4.591949 |
| C  | -9.636358  | -3.743851 | -5.561770 |
| H  | -9.816839  | -3.139798 | -6.459944 |
| H  | -10.595444 | -4.087394 | -5.153795 |
| H  | -9.028774  | -4.610578 | -5.828130 |

**MeOPhSe-**

E = -3.50072198

G = -3.41754322

N<sub>imag</sub> = not present.

|    |            |           |           |
|----|------------|-----------|-----------|
| Se | -11.546479 | 1.683885  | 0.022929  |
| C  | -13.371780 | 1.210190  | -0.208298 |
| C  | -14.384228 | 2.180329  | -0.420268 |
| C  | -15.721769 | 1.843027  | -0.595002 |
| C  | -16.129758 | 0.503864  | -0.567152 |
| C  | -15.163618 | -0.484071 | -0.358229 |
| C  | -13.821704 | -0.128169 | -0.184205 |
| H  | -14.096745 | 3.228595  | -0.447204 |
| H  | -16.470635 | 2.617010  | -0.756565 |
| H  | -15.430727 | -1.536627 | -0.327309 |
| H  | -13.090700 | -0.917042 | -0.023945 |
| O  | -17.495371 | 0.274768  | -0.754376 |
| C  | -17.937487 | -1.061081 | -0.749153 |
| H  | -19.018843 | -1.026577 | -0.917181 |
| H  | -17.744757 | -1.563206 | 0.212380  |
| H  | -17.473477 | -1.659195 | -1.549592 |

**MeSSePhOMe**

E = -4.31303603

G = -4.19625422

N<sub>imag</sub> = not present.

|    |            |           |           |
|----|------------|-----------|-----------|
| Se | -10.436426 | 2.762228  | -2.493223 |
| C  | -10.174816 | 1.047557  | -3.356679 |
| C  | -9.266357  | 0.123668  | -2.821114 |
| C  | -9.109718  | -1.129261 | -3.397827 |
| C  | -9.855399  | -1.484119 | -4.532619 |
| C  | -10.765362 | -0.565455 | -5.073560 |
| C  | -10.921580 | 0.686664  | -4.479358 |
| H  | -8.679452  | 0.384149  | -1.944973 |
| H  | -8.408696  | -1.849257 | -2.985183 |
| H  | -11.360287 | -0.809888 | -5.945821 |
| H  | -11.634657 | 1.387248  | -4.903946 |
| O  | -9.620691  | -2.735179 | -5.021991 |
| C  | -10.335120 | -3.166933 | -6.175504 |
| H  | -9.981095  | -4.179366 | -6.377579 |
| H  | -10.123687 | -2.530430 | -7.043895 |
| H  | -11.417155 | -3.192461 | -5.995188 |
| S  | -9.395851  | 4.183422  | -3.822336 |
| C  | -7.650586  | 4.123823  | -3.304270 |
| H  | -7.142861  | 4.886155  | -3.905264 |
| H  | -7.544642  | 4.370566  | -2.246026 |
| H  | -7.207712  | 3.148790  | -3.517224 |

**ClPhSeSePhCl**

E = -5.19629341

G = -5.08208169

N<sub>imag</sub> = not present.

|    |            |           |           |
|----|------------|-----------|-----------|
| Se | -11.576203 | 1.727012  | 0.025744  |
| C  | -13.430760 | 1.243837  | -0.252541 |
| C  | -14.420676 | 2.230681  | -0.316035 |
| C  | -15.760858 | 1.880531  | -0.460147 |
| C  | -16.111656 | 0.531643  | -0.536172 |
| C  | -15.138039 | -0.464927 | -0.467976 |
| C  | -13.799291 | -0.103718 | -0.327154 |
| Cl | -17.784964 | 0.088144  | -0.714923 |
| H  | -14.148346 | 3.279893  | -0.252246 |
| H  | -16.527757 | 2.646942  | -0.508814 |
| H  | -15.422786 | -1.510632 | -0.525138 |
| H  | -13.041431 | -0.879578 | -0.275113 |
| Se | -10.808849 | 2.249620  | -2.145423 |
| C  | -10.268915 | 0.533673  | -2.862877 |
| C  | -9.069698  | -0.068096 | -2.065657 |
| C  | -8.662711  | -1.274151 | -3.029682 |
| C  | -9.456945  | -1.876184 | -4.007552 |
| C  | -10.650671 | -1.285660 | -4.420985 |
| C  | -11.054540 | -0.083294 | -3.842150 |
| Cl | -8.948114  | -3.380225 | -4.720384 |
| H  | -8.446192  | 0.403875  | -1.712357 |
| H  | -7.732885  | -1.740420 | -2.719942 |
| H  | -11.260305 | -1.761549 | -5.182381 |
| H  | -11.988049 | 0.372403  | -4.158643 |

**ClPhSe-**

E = -2.64796613

G = -2.60380380

N<sub>imag</sub> = not present.

|    |            |           |           |
|----|------------|-----------|-----------|
| Se | -11.556439 | 1.699342  | 0.040079  |
| C  | -13.368734 | 1.221453  | -0.203068 |
| C  | -14.385150 | 2.187565  | -0.416687 |
| C  | -15.722197 | 1.844619  | -0.600737 |
| C  | -16.100804 | 0.501505  | -0.577168 |
| C  | -15.139275 | -0.488299 | -0.368473 |
| C  | -13.806593 | -0.127703 | -0.186232 |
| Cl | -17.794221 | 0.054995  | -0.811839 |
| H  | -14.104651 | 3.237642  | -0.437460 |
| H  | -16.468684 | 2.618658  | -0.762362 |
| H  | -15.430669 | -1.535786 | -0.349021 |
| H  | -13.068574 | -0.909440 | -0.024942 |

**MeSSePhCl**

E = -3.44742340

G = -3.36823612

N<sub>imag</sub> = not present.

|    |            |           |           |
|----|------------|-----------|-----------|
| Se | -10.074126 | 2.576337  | -2.094539 |
| C  | -9.980458  | 0.916688  | -3.104200 |
| C  | -9.389102  | -0.187315 | -2.483365 |

|    |            |           |           |
|----|------------|-----------|-----------|
| C  | -9.365956  | -1.428225 | -3.119921 |
| C  | -9.918816  | -1.554444 | -4.393009 |
| C  | -10.500482 | -0.455398 | -5.027642 |
| C  | -10.538780 | 0.774652  | -4.376394 |
| H  | -8.934925  | -0.089911 | -1.500719 |
| H  | -8.907009  | -2.284194 | -2.635591 |
| H  | -10.930676 | -0.563790 | -6.018272 |
| H  | -11.000540 | 1.624145  | -4.869964 |
| Cl | -9.879830  | -3.095945 | -5.203113 |
| S  | -9.688260  | 4.133333  | -3.588233 |
| C  | -7.872213  | 4.217839  | -3.716683 |
| H  | -7.670856  | 5.040983  | -4.410777 |
| H  | -7.420461  | 4.442579  | -2.748904 |
| H  | -7.462619  | 3.293156  | -4.127504 |

**CF<sub>3</sub>PhSeSePhCF<sub>3</sub>**

E = -6.57336209

G = -6.43374017

N<sub>imag</sub> = not present.

|    |            |           |           |
|----|------------|-----------|-----------|
| Se | -11,544678 | 1,856213  | -0,047375 |
| C  | -13,386372 | 1,285806  | -0,273391 |
| C  | -14,395069 | 2,212143  | -0,558201 |
| C  | -15,717999 | 1,794696  | -0,658231 |
| C  | -16,047332 | 0,449599  | -0,460779 |
| C  | -15,042787 | -0,475151 | -0,172161 |
| C  | -13,715386 | -0,058759 | -0,081070 |
| C  | -17,485765 | 0,001026  | -0,613381 |
| H  | -14,149700 | 3,260141  | -0,698990 |
| H  | -16,494356 | 2,520965  | -0,877380 |
| H  | -15,288220 | -1,520818 | -0,018940 |
| H  | -12,938887 | -0,784934 | 0,138857  |
| F  | -18,361874 | 0,923123  | -0,137188 |
| F  | -17,739260 | -1,162070 | 0,035640  |
| F  | -17,804274 | -0,201098 | -1,924310 |
| Se | -10,861925 | 2,322247  | -2,247786 |
| C  | -10,328063 | 0,588849  | -2,935933 |
| C  | -9,297236  | -0,151584 | -2,347637 |
| C  | -8,897363  | -1,358299 | -2,909756 |
| C  | -9,509042  | -1,829542 | -4,077224 |
| C  | -10,532783 | -1,089079 | -4,668343 |
| C  | -10,946175 | 0,113435  | -4,095554 |
| C  | -9,083907  | -3,162770 | -4,654376 |
| H  | -8,804426  | 0,212707  | -1,451810 |
| H  | -8,095945  | -1,925240 | -2,446174 |
| H  | -11,017986 | -1,446942 | -5,570263 |
| H  | -11,754286 | 0,675250  | -4,554422 |
| F  | -9,451158  | -3,311360 | -5,950758 |
| F  | -9,639306  | -4,201458 | -3,965464 |
| F  | -7,737189  | -3,335906 | -4,598600 |

**CF<sub>3</sub>PhSe-**

E = -3.34581625

G = -3.29272820

N<sub>imag</sub> = not present.

|    |            |           |           |
|----|------------|-----------|-----------|
| Se | -11.552865 | 1.707326  | -0.005637 |
| C  | -13.356278 | 1.224688  | -0.214440 |
| C  | -14.367064 | 2.177780  | -0.515924 |
| C  | -15.697941 | 1.825490  | -0.672005 |
| C  | -16.114875 | 0.489208  | -0.528658 |
| C  | -15.133600 | -0.476575 | -0.237512 |
| C  | -13.804212 | -0.118213 | -0.082725 |
| C  | -17.527175 | 0.098180  | -0.760559 |
| H  | -14.075634 | 3.219091  | -0.625259 |
| H  | -16.428490 | 2.597121  | -0.902939 |
| H  | -15.419572 | -1.519824 | -0.125809 |
| H  | -13.069802 | -0.885126 | 0.149132  |
| F  | -18.426675 | 1.088891  | -0.459740 |
| F  | -17.916854 | -1.001414 | -0.038380 |
| F  | -17.806454 | -0.236604 | -2.080605 |

**MeSSePhCF<sub>3</sub>**

E = -4.13714356

G = -4.04829449

N<sub>imag</sub> = not present.

|    |           |           |           |
|----|-----------|-----------|-----------|
| Se | -9.738766 | 2.434833  | -1.960887 |
| C  | -9.802095 | 0.813054  | -3.030679 |
| C  | -9.531473 | -0.382761 | -2.355966 |

|   |            |           |           |
|---|------------|-----------|-----------|
| C | -9.596497  | -1.596572 | -3.032662 |
| C | -9.925756  | -1.629558 | -4.390549 |
| C | -10.186846 | -0.432017 | -5.061266 |
| C | -10.131666 | 0.783704  | -4.385238 |
| C | -9.937987  | -2.942113 | -5.138482 |
| H | -9.265908  | -0.378454 | -1.301523 |
| H | -9.386714  | -2.517021 | -2.497305 |
| H | -10.445580 | -0.442429 | -6.115360 |
| H | -10.349966 | 1.705698  | -4.914536 |
| F | -10.799806 | -2.932225 | -6.187971 |
| F | -10.289677 | -3.986685 | -4.344367 |
| F | -8.706379  | -3.240483 | -5.649582 |
| S | -9.793358  | 4.069737  | -3.408464 |
| C | -8.050067  | 4.335365  | -3.873578 |
| H | -8.063403  | 5.199716  | -4.546151 |
| H | -7.442972  | 4.568806  | -2.997518 |
| H | -7.644875  | 3.471958  | -4.403916 |

**TCI: [PhSeSePh+SMe]<sup>-</sup>**

E = -6.21909876

G = -6.05397160

N<sub>imag</sub> = not present.

|    |            |           |           |
|----|------------|-----------|-----------|
| Se | -11.548359 | 1.362392  | 0.192070  |
| C  | -13.383527 | 0.882452  | -0.036846 |
| C  | -14.097759 | 1.136309  | -1.224830 |
| C  | -15.438225 | 0.777175  | -1.351749 |
| C  | -16.118653 | 0.153474  | -0.302358 |
| C  | -15.423544 | -0.104198 | 0.882926  |
| C  | -14.083015 | 0.251545  | 1.014138  |
| H  | -13.591424 | 1.624399  | -2.051338 |
| H  | -15.958144 | 0.989048  | -2.285736 |
| H  | -17.165144 | -0.125630 | -0.405437 |
| H  | -15.930310 | -0.589927 | 1.716648  |
| H  | -13.560283 | 0.040083  | 1.943969  |
| Se | -10.535346 | 2.648545  | -2.172499 |
| C  | -10.218689 | 0.961634  | -3.105483 |
| C  | -9.366065  | -0.004305 | -2.559888 |
| C  | -9.128972  | -1.202517 | -3.234498 |
| C  | -9.737779  | -1.452915 | -4.265091 |
| C  | -10.588556 | -0.491746 | -5.013400 |
| C  | -10.828198 | 0.705501  | -4.338795 |
| H  | -8.898499  | 0.177317  | -1.597543 |
| H  | -8.464857  | -1.943782 | -2.793048 |
| H  | -9.554175  | -2.388449 | -4.989628 |
| H  | -11.075367 | -0.675419 | -5.969832 |
| H  | -11.485710 | 1.450619  | -4.775676 |
| S  | -9.591371  | 4.056601  | -3.923270 |
| C  | -7.797089  | 3.895038  | -3.654293 |
| H  | -7.291879  | 4.635546  | -4.285521 |
| H  | -7.536292  | 4.090007  | -2.609229 |
| H  | -7.438502  | 2.898502  | -3.931721 |

**TCI: [MePhSeSePhMe+SMe]<sup>-</sup>**

E = -7.39213128

G = -7.17970172

N<sub>imag</sub> = not present.

|    |            |           |           |
|----|------------|-----------|-----------|
| Se | -11.528473 | 1.425835  | 0.184952  |
| C  | -13.357625 | 0.923873  | -0.051100 |
| C  | -14.111084 | 1.278260  | -1.186263 |
| C  | -15.447106 | 0.905289  | -1.314881 |
| C  | -16.108643 | 0.163729  | -0.326627 |
| C  | -15.361222 | -0.186146 | 0.806333  |
| C  | -14.023883 | 0.178811  | 0.942836  |
| H  | -13.641189 | 1.860672  | -1.972570 |
| H  | -15.989485 | 1.205187  | -2.212083 |
| H  | -15.833218 | -0.759954 | 1.604598  |
| H  | -13.480615 | -0.114102 | 1.838237  |
| C  | -17.544780 | -0.268927 | -0.491234 |
| H  | -18.117052 | 0.451727  | -1.086487 |
| H  | -18.047924 | -0.374753 | 0.476706  |
| H  | -17.623824 | -1.240422 | -1.001936 |
| Se | -10.528873 | 2.693937  | -2.193960 |
| C  | -10.219223 | 0.984059  | -3.088918 |
| C  | -9.302558  | 0.061319  | -2.576294 |
| C  | -9.072858  | -1.150471 | -3.226635 |
| C  | -9.746838  | -1.484035 | -4.407697 |
| C  | -10.658781 | -0.551205 | -4.916427 |

|   |            |           |           |
|---|------------|-----------|-----------|
| C | -10.893923 | 0.661441  | -4.270069 |
| H | -8.772624  | 0.287022  | -1.656234 |
| H | -8.353047  | -1.849376 | -2.802090 |
| H | -11.202038 | -0.774899 | -5.833854 |
| H | -11.601555 | 1.367609  | -4.693538 |
| C | -9.526479  | -2.814061 | -5.085939 |
| H | -9.682332  | -2.745891 | -6.167827 |
| H | -10.222119 | -3.575123 | -4.705714 |
| H | -8.512247  | -3.190192 | -4.914554 |
| S | -9.591137  | 4.057468  | -3.984413 |
| C | -7.796055  | 3.917347  | -3.708647 |
| H | -7.294713  | 4.640267  | -4.363027 |
| H | -7.537382  | 4.147812  | -2.670220 |
| H | -7.430045  | 2.914842  | -3.953173 |

|    |            |           |           |
|----|------------|-----------|-----------|
| C  | -9.754128  | -1.433992 | -4.484685 |
| C  | -10.494264 | -0.426565 | -5.099387 |
| C  | -10.724262 | 0.765649  | -4.413473 |
| H  | -9.099104  | 0.065929  | -1.521146 |
| H  | -8.673533  | -2.051111 | -2.724776 |
| H  | -10.892519 | -0.571488 | -6.099101 |
| H  | -11.292263 | 1.552681  | -4.898999 |
| Cl | -9.456563  | -2.937843 | -5.341093 |
| S  | -9.618741  | 4.068871  | -3.914803 |
| C  | -7.820557  | 3.918695  | -3.666494 |
| H  | -7.331510  | 4.668806  | -4.298587 |
| H  | -7.550666  | 4.109043  | -2.623302 |
| H  | -7.457488  | 2.927660  | -3.956391 |

**TCI: [MeOPhSeSePhOMe+SMe]<sup>-</sup>**

E = -7.82587018

G = -7.60489055

N<sub>imag</sub> = not present.

|    |            |           |           |
|----|------------|-----------|-----------|
| Se | -11.400189 | 1.628185  | 0.315266  |
| C  | -13.226962 | 1.152216  | -0.006912 |
| C  | -14.176844 | 2.092240  | -0.456484 |
| C  | -15.507735 | 1.749133  | -0.661134 |
| C  | -15.950976 | 0.443169  | -0.417355 |
| C  | -15.032025 | -0.511043 | 0.025510  |
| C  | -13.692980 | -0.152527 | 0.217040  |
| H  | -13.858247 | 3.112530  | -0.649032 |
| H  | -16.223615 | 2.490379  | -1.009756 |
| H  | -15.330851 | -1.536147 | 0.219539  |
| H  | -12.990997 | -0.912314 | 0.550446  |
| O  | -17.299311 | 0.210431  | -0.645416 |
| C  | -17.791529 | -1.093212 | -0.418866 |
| H  | -18.858893 | -1.058662 | -0.655277 |
| H  | -17.668888 | -1.407157 | 0.628553  |
| H  | -17.307232 | -1.838216 | -1.067523 |
| Se | -10.476537 | 2.758871  | -2.150726 |
| C  | -10.233780 | 1.004079  | -2.952242 |
| C  | -9.128318  | 0.206609  | -2.627176 |
| C  | -8.942977  | -1.039470 | -3.214249 |
| C  | -9.868619  | -1.523721 | -4.146899 |
| C  | -10.979297 | -0.743294 | -4.478436 |
| C  | -11.150136 | 0.508348  | -3.879422 |
| H  | -8.408617  | 0.562279  | -1.896029 |
| H  | -8.084496  | -1.654906 | -2.956637 |
| H  | -11.720929 | -1.088355 | -5.190514 |
| H  | -12.017798 | 1.104564  | -4.145204 |
| O  | -9.592076  | -2.771328 | -4.671147 |
| C  | -10.500776 | -3.315546 | -5.609255 |
| H  | -10.096110 | -4.292667 | -5.886459 |
| H  | -10.583152 | -2.693822 | -6.512210 |
| H  | -11.503383 | -3.452563 | -5.180165 |
| S  | -9.670197  | 4.016493  | -4.092713 |
| C  | -7.858272  | 3.949007  | -3.916621 |
| H  | -7.419450  | 4.645519  | -4.641085 |
| H  | -7.547673  | 4.250639  | -2.911004 |
| H  | -7.471222  | 2.945581  | -4.122749 |

**TCI: [ClPhSeSePhCl+SMe]<sup>-</sup>**

E = -6.11038423

G = -5.96772745

N<sub>imag</sub> = not present.

|    |            |           |           |
|----|------------|-----------|-----------|
| Se | -11.534942 | 1.365769  | 0.218085  |
| C  | -13.363768 | 0.875323  | -0.008980 |
| C  | -14.063841 | 1.061802  | -1.217291 |
| C  | -15.402611 | 0.700156  | -1.353035 |
| C  | -16.080024 | 0.138177  | -0.272411 |
| C  | -15.420876 | -0.061521 | 0.939904  |
| C  | -14.082392 | 0.303831  | 1.061974  |
| H  | -13.551928 | 1.503484  | -2.065962 |
| H  | -15.916260 | 0.856208  | -2.297699 |
| H  | -15.947834 | -0.499755 | 1.783037  |
| H  | -13.580050 | 0.142194  | 2.012336  |
| Cl | -17.771061 | -0.321581 | -0.437018 |
| Se | -10.528165 | 2.650728  | -2.183333 |
| C  | -10.221929 | 0.966390  | -3.123681 |
| C  | -9.483668  | -0.060982 | -2.527544 |
| C  | -9.247493  | -1.260716 | -3.198908 |

**TCI: [CF<sub>3</sub>PhSeSePhCF<sub>3</sub>+SMe]<sup>-</sup>**

E = -7.49761582

G = -7.33353016

N<sub>imag</sub> = not present.

|    |            |           |           |
|----|------------|-----------|-----------|
| Se | -11.582815 | 1.351162  | 0.245421  |
| C  | -13.410814 | 0.864290  | 0.110725  |
| C  | -14.105771 | 0.822400  | -1.117516 |
| C  | -15.446093 | 0.464549  | -1.184593 |
| C  | -16.157501 | 0.124037  | -0.025902 |
| C  | -15.485090 | 0.165875  | 1.205356  |
| C  | -14.147044 | 0.524944  | 1.269554  |
| H  | -13.581717 | 1.079937  | -2.032026 |
| H  | -15.941655 | 0.445915  | -2.151045 |
| H  | -16.012263 | -0.089254 | 2.120981  |
| H  | -13.648304 | 0.545221  | 2.234744  |
| C  | -17.612423 | -0.210376 | -0.077356 |
| F  | -18.026645 | -0.635376 | -1.305947 |
| F  | -18.423435 | 0.862404  | 0.233220  |
| F  | -17.967864 | -1.192272 | 0.809637  |
| Se | -10.551916 | 2.535900  | -2.371899 |
| C  | -10.166227 | 0.883080  | -3.354084 |
| C  | -10.125483 | -0.340492 | -2.668946 |
| C  | -9.858069  | -1.525284 | -3.347280 |
| C  | -9.625020  | -1.522326 | -4.726546 |
| C  | -9.664151  | -0.303597 | -5.412453 |
| C  | -9.935660  | 0.880563  | -4.736081 |
| H  | -10.320289 | -0.364366 | -1.601484 |
| H  | -9.834981  | -2.457479 | -2.790648 |
| H  | -9.491624  | -0.274173 | -6.484611 |
| H  | -9.962149  | 1.816591  | -5.284682 |
| C  | -9.275109  | -2.789680 | -5.451369 |
| F  | -9.723159  | -2.804615 | -6.740976 |
| F  | -9.779903  | -3.904126 | -4.852923 |
| F  | -7.916524  | -2.989614 | -5.529595 |
| S  | -9.753843  | 4.116172  | -3.929683 |
| C  | -7.965531  | 4.166175  | -3.581510 |
| H  | -7.550313  | 5.016228  | -4.134101 |
| H  | -7.780889  | 4.313548  | -2.514161 |
| H  | -7.466893  | 3.251219  | -3.913801 |

**TCI: [PhSeSePh+SMe]<sup>-</sup> conformer a**

E = -6.21910960 Hartree

N<sub>imag</sub> = not present.

|    |            |           |           |
|----|------------|-----------|-----------|
| Se | -11.504567 | 1.369780  | 0.065720  |
| C  | -13.349222 | 0.895379  | -0.084762 |
| C  | -14.102678 | 1.120548  | -1.254139 |
| C  | -15.448937 | 0.767697  | -1.324399 |
| C  | -16.096434 | 0.179402  | -0.234484 |
| C  | -15.362223 | -0.049602 | 0.932944  |
| C  | -14.015554 | 0.299443  | 1.007333  |
| H  | -13.622060 | 1.580941  | -2.111356 |
| H  | -15.999600 | 0.956445  | -2.245637 |
| H  | -17.147603 | -0.094925 | -0.293297 |
| H  | -15.842743 | -0.507929 | 1.797159  |
| H  | -13.461856 | 0.109846  | 1.923852  |
| Se | -10.542855 | 2.501383  | -2.400538 |
| C  | -10.318174 | 0.761029  | -3.259194 |
| C  | -9.481188  | -0.208319 | -2.695770 |
| C  | -9.309675  | -1.445044 | -3.318782 |
| C  | -9.969692  | -1.731360 | -4.514668 |
| C  | -10.805265 | -0.767002 | -5.080447 |
| C  | -10.979394 | 0.468848  | -4.457365 |

|   |            |           |           |
|---|------------|-----------|-----------|
| H | -8.974525  | 0.001591  | -1.759340 |
| H | -8.656631  | -2.188186 | -2.864170 |
| H | -9.837225  | -2.696806 | -4.998874 |
| H | -11.331532 | -0.978068 | -6.009954 |
| H | -11.625517 | 1.215790  | -4.907884 |
| S | -9.620061  | 3.787905  | -4.252088 |
| C | -7.823317  | 3.575846  | -4.040585 |
| H | -7.317804  | 4.267097  | -4.725178 |
| H | -7.516835  | 3.811056  | -3.016428 |
| H | -7.509245  | 2.555145  | -4.281689 |

**TCI: [PhSeSePh+SMe]<sup>-</sup> conformer b**

E = -6.21910607 Hartree

N<sub>imag</sub> = not present.

|    |            |           |           |
|----|------------|-----------|-----------|
| Se | -11.878944 | 1.545819  | 0.354483  |
| C  | -13.628719 | 0.842152  | 0.048791  |
| C  | -14.333905 | 1.043134  | -1.154664 |
| C  | -15.612851 | 0.520880  | -1.337560 |
| C  | -16.238643 | -0.219505 | -0.330830 |
| C  | -15.551694 | -0.427013 | 0.868944  |
| C  | -14.272241 | 0.091487  | 1.055891  |
| H  | -13.869871 | 1.619268  | -1.948741 |
| H  | -16.127579 | 0.696426  | -2.281903 |
| H  | -17.237212 | -0.625697 | -0.477571 |
| H  | -16.016456 | -1.001545 | 1.670029  |
| H  | -13.754286 | -0.083716 | 1.995871  |
| Se | -10.941461 | 2.982629  | -1.960751 |
| C  | -10.401434 | 1.361665  | -2.907896 |
| C  | -9.472922  | 0.481969  | -2.340838 |
| C  | -9.076441  | -0.667562 | -3.025181 |
| C  | -9.599108  | -0.954364 | -4.287014 |
| C  | -10.525200 | -0.079086 | -4.856668 |
| C  | -10.924492 | 1.069029  | -4.172358 |
| H  | -9.071105  | 0.691096  | -1.354721 |
| H  | -8.355162  | -1.342124 | -2.566801 |
| H  | -9.290970  | -1.852012 | -4.819321 |
| H  | -10.946266 | -0.292506 | -5.837815 |
| H  | -11.639841 | 1.748139  | -4.625623 |
| S  | -10.108335 | 4.524187  | -3.651761 |
| C  | -8.317285  | 4.561749  | -3.322251 |
| H  | -7.879359  | 5.367922  | -3.922539 |
| H  | -8.115421  | 4.763092  | -2.265438 |
| H  | -7.838300  | 3.618389  | -3.603764 |

**Water phase**

MeS<sup>-</sup>

E = -0.97168143

G = -0.95847800

N<sub>imag</sub> = not present.

|   |           |           |            |
|---|-----------|-----------|------------|
| S | 0.000000  | 0.000000  | -10.347919 |
| C | 0.000000  | 0.000000  | -8.504374  |
| H | 0.511103  | 0.885256  | -8.109940  |
| H | -1.022206 | 0.000000  | -8.109940  |
| H | 0.511103  | -0.885256 | -8.109940  |

**PhSeSePh**

E = -5.31880585

G = -5.18574462

N<sub>imag</sub> = not present.

|    |            |           |           |
|----|------------|-----------|-----------|
| Se | -11.567688 | 1.687709  | 0.074919  |
| C  | -13.424776 | 1.213354  | -0.228544 |
| C  | -14.392483 | 2.206057  | -0.425362 |
| C  | -15.731516 | 1.848653  | -0.584742 |
| C  | -16.111650 | 0.505130  | -0.537597 |
| C  | -15.147813 | -0.483083 | -0.332632 |
| C  | -13.804141 | -0.133290 | -0.181435 |
| H  | -14.104264 | 3.252832  | -0.453269 |
| H  | -16.479307 | 2.622845  | -0.738553 |
| H  | -17.156466 | 0.230568  | -0.658075 |
| H  | -15.437704 | -1.530276 | -0.293685 |
| H  | -13.057064 | -0.906364 | -0.027222 |
| Se | -10.781880 | 2.255072  | -2.082094 |
| C  | -10.262300 | 0.547127  | -2.843328 |
| C  | -9.080931  | -0.087376 | -2.440340 |
| C  | -8.695634  | -1.285046 | -3.042926 |
| C  | -9.477572  | -1.847094 | -4.055190 |

|   |            |           |           |
|---|------------|-----------|-----------|
| C | -10.650078 | -1.209458 | -4.462572 |
| C | -11.047601 | -0.015576 | -3.856334 |
| H | -8.463286  | 0.349892  | -1.661313 |
| H | -7.778357  | -1.775112 | -2.725644 |
| H | -9.171890  | -2.778063 | -4.525721 |
| H | -11.262392 | -1.641299 | -5.250452 |
| H | -11.964206 | 0.473698  | -4.172590 |

**PhSe<sup>-</sup>**

E = -2.78899960

G = -2.73243730

N<sub>imag</sub> = not present.

|    |            |           |           |
|----|------------|-----------|-----------|
| Se | -11.546266 | 1.702231  | 0.046230  |
| C  | -13.389035 | 1.216169  | -0.204994 |
| C  | -14.383699 | 2.193391  | -0.417236 |
| C  | -15.721128 | 1.839677  | -0.601877 |
| C  | -16.113388 | 0.498222  | -0.580832 |
| C  | -15.140853 | -0.483500 | -0.370660 |
| C  | -13.802799 | -0.132106 | -0.185818 |
| H  | -14.103406 | 3.243808  | -0.437742 |
| H  | -16.461619 | 2.621071  | -0.763596 |
| H  | -17.155274 | 0.223615  | -0.725306 |
| H  | -15.423684 | -1.534520 | -0.350155 |
| H  | -13.064910 | -0.914266 | -0.024154 |

**MeS<sup>-</sup>SePh**

E = -3.50996639

G = -3.42150206

N<sub>imag</sub> = not present.

|    |            |           |           |
|----|------------|-----------|-----------|
| Se | -9.588007  | 2.377794  | -1.914915 |
| C  | -9.751975  | 0.779642  | -3.021219 |
| C  | -9.498377  | -0.435273 | -2.372297 |
| C  | -9.624309  | -1.634959 | -3.073960 |
| C  | -9.993817  | -1.630592 | -4.420768 |
| C  | -10.240246 | -0.414922 | -0.506803 |
| C  | -10.124000 | 0.791009  | -4.365703 |
| H  | -9.202533  | -0.454942 | -1.325865 |
| H  | -9.426865  | -2.574289 | -2.562928 |
| H  | -10.086940 | -2.565997 | -4.966147 |
| H  | -10.528331 | -0.398482 | -6.109454 |
| H  | -10.323784 | 1.730475  | -4.871783 |
| S  | -9.772168  | 4.058671  | -3.304398 |
| C  | -8.081534  | 4.367880  | -3.911323 |
| H  | -8.170753  | 5.254183  | -4.547631 |
| H  | -7.404185  | 4.581020  | -3.083198 |
| H  | -7.717275  | 3.529282  | -4.506411 |

**MePhSeSePhMe**

E = -6.49490730

G = -6.31543138

N<sub>imag</sub> = not present.

|    |            |           |           |
|----|------------|-----------|-----------|
| Se | -11.593561 | 1.743090  | -0.007468 |
| C  | -13.450151 | 1.259694  | -0.271182 |
| C  | -14.441358 | 2.247326  | -0.336140 |
| C  | -15.780202 | 1.886390  | -0.465196 |
| C  | -16.170877 | 0.539312  | -0.529113 |
| C  | -15.168258 | -0.436443 | -0.454495 |
| C  | -13.822804 | -0.087124 | -0.328505 |
| C  | -17.621185 | 0.163453  | -0.686797 |
| H  | -14.170291 | 3.297914  | -0.282711 |
| H  | -16.535136 | 2.668456  | -0.511208 |
| H  | -15.438245 | -1.489334 | -0.494134 |
| H  | -13.068510 | -0.866585 | -0.271456 |
| H  | -18.256108 | 0.734640  | -0.001618 |
| H  | -17.782923 | -0.901074 | -0.500811 |
| H  | -17.970242 | 0.381967  | -1.703766 |
| Se | -10.823339 | 2.245198  | -2.193063 |
| C  | -10.267213 | 0.528033  | -2.895042 |
| C  | -9.058547  | -0.057268 | -2.496515 |
| C  | -8.649406  | -1.264767 | -3.055752 |
| C  | -9.419935  | -1.916625 | -4.032578 |
| C  | -10.621902 | -1.314637 | -4.425329 |
| C  | -11.048160 | -0.109303 | -3.864005 |
| C  | -8.953504  | -3.212104 | -4.644066 |
| H  | -8.436155  | 0.427159  | -1.749510 |
| H  | -7.709004  | -1.704723 | -2.730377 |
| H  | -11.243008 | -1.793981 | -5.178632 |

|   |            |           |           |
|---|------------|-----------|-----------|
| H | -11.988806 | 0.329361  | -4.184501 |
| H | -9.730869  | -3.667096 | -5.262556 |
| H | -8.661466  | -3.932202 | -3.872237 |
| H | -8.073144  | -3.048558 | -5.277761 |

**MePhSe<sup>-</sup>**

E = -3.37573615

G = -3.29410330

N<sub>imag</sub> = not present.

|    |            |           |           |
|----|------------|-----------|-----------|
| Se | -11.557694 | 1.771503  | -0.070824 |
| C  | -13.407647 | 1.273878  | -0.256214 |
| C  | -14.432966 | 2.239074  | -0.284232 |
| C  | -15.773452 | 1.875173  | -0.418519 |
| C  | -16.165894 | 0.533678  | -0.532889 |
| C  | -15.146831 | -0.429392 | -0.500448 |
| C  | -13.804235 | -0.073163 | -0.366642 |
| C  | -17.612969 | 0.146652  | -0.712905 |
| H  | -14.178133 | 3.292666  | -0.196271 |
| H  | -16.529998 | 2.658557  | -0.432395 |
| H  | -15.403377 | -1.484952 | -0.579703 |
| H  | -13.050131 | -0.856547 | -0.344329 |
| H  | -18.283978 | 0.872245  | -0.242932 |
| H  | -17.821577 | -0.838432 | -0.284093 |
| H  | -17.882300 | 0.099223  | -1.776762 |

**MeSSePhMe**

E = -4.09814845

G = -3.98665325

N<sub>imag</sub> = not present.

|    |            |           |           |
|----|------------|-----------|-----------|
| Se | -10.316653 | 2.642383  | -2.336495 |
| C  | -10.133137 | 0.932603  | -3.241690 |
| C  | -9.267312  | -0.028646 | -2.713161 |
| C  | -9.175972  | -1.289524 | -3.307134 |
| C  | -9.927598  | -1.615911 | -4.442631 |
| C  | -10.790791 | -0.636505 | -4.960366 |
| C  | -10.902664 | 0.618744  | -4.367826 |
| C  | -9.805010  | -2.964508 | -5.103380 |
| H  | -8.663975  | 0.197717  | -1.838436 |
| H  | -8.500250  | -2.026061 | -2.878171 |
| H  | -11.396342 | -0.861804 | -5.835743 |
| H  | -11.590452 | 1.349716  | -4.783430 |
| H  | -9.195939  | -2.896292 | -6.013684 |
| H  | -10.784322 | -3.352022 | -5.401652 |
| H  | -9.331201  | -3.694183 | -4.442011 |
| S  | -9.521992  | 4.087106  | -3.806338 |
| C  | -7.717942  | 4.089837  | -3.556723 |
| H  | -7.337487  | 4.852247  | -4.244333 |
| H  | -7.465214  | 4.366453  | -2.531789 |
| H  | -7.284179  | 3.122525  | -3.815866 |

**MeOPhSeSePhOMe**

E = -6.93730663

G = -6.74732550

N<sub>imag</sub> = not present.

|    |            |           |           |
|----|------------|-----------|-----------|
| Se | -11.651954 | 1.592680  | -0.000719 |
| C  | -13.508044 | 1.141757  | -0.273737 |
| C  | -14.491803 | 2.143009  | -0.306757 |
| C  | -15.831764 | 1.810965  | -0.443608 |
| C  | -16.223230 | 0.464266  | -0.546780 |
| C  | -15.247871 | -0.541810 | -0.509739 |
| C  | -13.902321 | -0.195717 | -0.375749 |
| H  | -14.210313 | 3.188709  | -0.223184 |
| H  | -16.592956 | 2.586105  | -0.467439 |
| H  | -15.516115 | -1.588941 | -0.582944 |
| H  | -13.158748 | -0.986912 | -0.348236 |
| O  | -17.561706 | 0.248902  | -0.675321 |
| C  | -18.039082 | -1.100291 | -0.782644 |
| H  | -19.122334 | -1.018192 | -0.874667 |
| H  | -17.790575 | -1.679976 | 0.112475  |
| H  | -17.632709 | -1.594078 | -1.671508 |
| Se | -10.851100 | 2.148101  | -2.175401 |
| C  | -10.275697 | 0.462307  | -2.917306 |
| C  | -9.012841  | -0.067265 | -2.607199 |
| C  | -8.581287  | -1.249431 | -3.190781 |
| C  | -9.401772  | -1.930100 | -4.107997 |
| C  | -10.661715 | -1.405536 | -4.427007 |
| C  | -11.088320 | -0.218836 | -3.828433 |

|   |            |           |           |
|---|------------|-----------|-----------|
| H | -8.361289  | 0.446855  | -1.906589 |
| H | -7.603503  | -1.658603 | -2.951257 |
| H | -11.316970 | -1.903534 | -5.131574 |
| H | -12.067864 | 0.174026  | -4.085024 |
| O | -8.880709  | -3.077028 | -4.625381 |
| C | -9.657399  | -3.824111 | -5.573155 |
| H | -9.865649  | -3.230271 | -6.469284 |
| H | -10.596305 | -4.170878 | -5.129034 |
| H | -9.041410  | -4.683113 | -5.840211 |

**MeOPhSe<sup>-</sup>**

E = -3.59500933

G = -3.51070760

N<sub>imag</sub> = not present.

|    |            |           |           |
|----|------------|-----------|-----------|
| Se | -11.538102 | 1.685785  | 0.030211  |
| C  | -13.390613 | 1.206830  | -0.209597 |
| C  | -14.384389 | 2.185103  | -0.419719 |
| C  | -15.722158 | 1.845936  | -0.596429 |
| C  | -16.128038 | 0.503405  | -0.570296 |
| C  | -15.162465 | -0.487135 | -0.361798 |
| C  | -13.820702 | -0.129910 | -0.185757 |
| H  | -14.105851 | 3.235729  | -0.446166 |
| H  | -16.467259 | 2.621887  | -0.572290 |
| H  | -15.430703 | -1.537439 | -0.333155 |
| H  | -13.094987 | -0.923781 | -0.026148 |
| O  | -17.471815 | 0.276184  | -0.756809 |
| C  | -17.938908 | -1.076075 | -0.746572 |
| H  | -19.015345 | -1.016996 | -0.913983 |
| H  | -17.747991 | -1.558865 | 0.218863  |
| H  | -17.478752 | -1.664958 | -1.548524 |

**MeSSePhOMe**

E = -4.31923053

G = -4.20305553

N<sub>imag</sub> = not present.

|    |            |           |           |
|----|------------|-----------|-----------|
| Se | -10.463851 | 2.780781  | -2.564913 |
| C  | -10.187180 | 1.058165  | -3.404247 |
| C  | -9.244471  | 0.160964  | -2.880079 |
| C  | -9.079173  | -1.096907 | -3.444724 |
| C  | -9.852623  | -1.484799 | -4.551974 |
| C  | -10.798845 | -0.593767 | -5.078877 |
| C  | -10.960885 | 0.664935  | -4.499590 |
| H  | -8.637556  | 0.441799  | -2.042286 |
| H  | -8.350301  | -1.792862 | -3.038317 |
| H  | -11.415263 | -0.864579 | -5.927665 |
| H  | -11.702399 | 1.341170  | -4.915377 |
| O  | -9.609962  | -2.736102 | -5.031731 |
| C  | -10.358185 | -3.200209 | -6.165242 |
| H  | -9.990239  | -4.207283 | -6.362968 |
| H  | -10.181796 | -2.567501 | -7.041380 |
| H  | -11.429686 | -3.239337 | -5.943061 |
| S  | -9.328073  | 4.180164  | -3.854179 |
| C  | -7.617800  | 4.142372  | -3.229362 |
| H  | -7.081522  | 4.890235  | -3.822583 |
| H  | -7.580293  | 4.421070  | -2.174900 |
| H  | -7.162048  | 3.163611  | -3.388124 |

**ClPhSeSePhCl**

E = -5.20005103

G = -5.08634327

N<sub>imag</sub> = not present.

|    |            |           |           |
|----|------------|-----------|-----------|
| Se | -11.577764 | 1.725673  | 0.016205  |
| C  | -13.435342 | 1.243474  | -0.250239 |
| C  | -14.422635 | 2.233260  | -0.319575 |
| C  | -15.764972 | 1.884115  | -0.454121 |
| C  | -16.115260 | 0.534479  | -0.513539 |
| C  | -15.145875 | -0.465519 | -0.438703 |
| C  | -13.805183 | -0.104995 | -0.307761 |
| Cl | -17.794176 | 0.091181  | -0.680063 |
| H  | -14.152670 | 3.283673  | -0.267651 |
| H  | -16.528097 | 2.653794  | -0.507039 |
| H  | -15.429579 | -1.512005 | -0.482244 |
| H  | -13.052020 | -0.884746 | -0.248681 |
| Se | -10.825354 | 2.245091  | -2.167033 |
| C  | -10.273363 | 0.529214  | -2.878207 |
| C  | -9.086866  | -0.079320 | -2.452662 |
| C  | -8.670623  | -1.284398 | -3.014046 |



|    |            |           |           |   |            |           |           |
|----|------------|-----------|-----------|---|------------|-----------|-----------|
| C  | -9.443606  | -1.872985 | -4.016563 | H | -10.061109 | 1.749997  | -4.952784 |
| C  | -10.623349 | -1.276369 | -4.459555 | F | -8.410812  | -2.468826 | -6.545287 |
| C  | -11.037085 | -0.075649 | -3.882441 | F | -10.142325 | -3.563501 | -5.788847 |
| Cl | -8.921853  | -3.378062 | -4.728269 | F | -8.255881  | -3.611378 | -4.691188 |
| H  | -8.477545  | 0.381506  | -1.681125 |   |            |           |           |
| H  | -7.751004  | -1.754487 | -2.681000 |   |            |           |           |
| H  | -11.216970 | -1.741229 | -5.239972 |   |            |           |           |
| H  | -11.959448 | 0.384124  | -4.224267 |   |            |           |           |

**ClPhSe<sup>-</sup>**

E = -2.73062582  
G = -2.68581906  
N<sub>imag</sub> = not present.

|    |            |           |           |
|----|------------|-----------|-----------|
| Se | -11.547776 | 1.701711  | 0.042708  |
| C  | -13.387456 | 1.216520  | -0.205666 |
| C  | -14.384822 | 2.190239  | -0.417234 |
| C  | -15.723722 | 1.845980  | -0.601187 |
| C  | -16.097331 | 0.502434  | -0.576530 |
| C  | -15.139949 | -0.490277 | -0.368664 |
| C  | -13.805044 | -0.129931 | -0.186300 |
| Cl | -17.778561 | 0.059190  | -0.808673 |
| H  | -14.112260 | 3.242203  | -0.439476 |
| H  | -16.467469 | 2.620987  | -0.762464 |
| H  | -15.428505 | -1.537244 | -0.348718 |
| H  | -13.073095 | -0.917262 | -0.025706 |

**MeSsePhCl**

E = -3.45060075  
G = -3.37340614

|    |            |           |           |
|----|------------|-----------|-----------|
| Se | -10.014653 | 2.552319  | -2.063344 |
| C  | -9.954052  | 0.898960  | -3.089694 |
| C  | -9.404949  | -0.223586 | -2.461657 |
| C  | -9.399699  | -1.461090 | -3.106532 |
| C  | -9.930345  | -1.562261 | -4.391371 |
| C  | -10.472631 | -0.447625 | -5.032548 |
| C  | -10.491382 | 0.780055  | -4.373372 |
| H  | -8.971474  | -0.147572 | -1.468093 |
| H  | -8.972245  | -2.329391 | -2.615557 |
| H  | -10.886607 | -0.535416 | -6.031997 |
| H  | -10.923842 | 1.641016  | -4.873352 |
| Cl | -9.912711  | -3.103564 | -5.213454 |
| S  | -9.695290  | 4.128068  | -3.559081 |
| C  | -7.887200  | 4.255119  | -3.742182 |
| H  | -7.732848  | 5.087548  | -4.436309 |
| H  | -7.413186  | 4.485064  | -2.786773 |
| H  | -7.471996  | 3.342846  | -4.173514 |

**CF<sub>3</sub>PhSeSePhCF<sub>3</sub>**

E = -6.58038964  
G = -6.44919427  
N<sub>imag</sub> = not present.

|    |            |           |           |
|----|------------|-----------|-----------|
| Se | -11.475792 | 1.603216  | -0.060569 |
| C  | -13.347403 | 1.080344  | -0.090776 |
| C  | -14.128670 | 0.979414  | -1.242938 |
| C  | -15.459489 | 0.585720  | -1.145812 |
| C  | -16.021130 | 0.286897  | 0.100315  |
| C  | -15.237669 | 0.389435  | 1.252080  |
| C  | -13.905727 | 0.784784  | 1.158097  |
| C  | -17.467156 | -0.129965 | 0.169436  |
| H  | -13.710892 | 1.209512  | -2.217201 |
| H  | -16.054850 | 0.511603  | -2.050983 |
| H  | -15.654884 | 0.165222  | 2.227468  |
| H  | -13.313306 | 0.860028  | 2.066030  |
| F  | -18.307651 | 0.860569  | -0.264381 |
| F  | -17.872581 | -0.459093 | 1.420144  |
| F  | -17.728517 | -1.212915 | -0.624284 |
| Se | -10.977363 | 2.239797  | -2.237832 |
| C  | -10.398083 | 0.615787  | -3.135227 |
| C  | -10.336639 | -0.645249 | -2.541455 |
| C  | -9.896610  | -1.739506 | -3.280233 |
| C  | -9.512004  | -1.583744 | -4.615837 |
| C  | -9.578782  | -0.320531 | -5.209815 |
| C  | -10.018695 | 0.775699  | -4.473249 |
| C  | -9.075569  | -2.789427 | -5.406634 |
| H  | -10.624459 | -0.783261 | -1.504625 |
| H  | -9.853757  | -2.714219 | -2.804144 |
| H  | -9.288413  | -0.179461 | -6.245193 |

**CF<sub>3</sub>PhSe<sup>-</sup>**

E = -3.42376930  
G = -3.36823486  
N<sub>imag</sub> = not present.

|    |            |           |           |
|----|------------|-----------|-----------|
| Se | -11.544270 | 1.710349  | -0.000007 |
| C  | -13.376681 | 1.219390  | -0.215856 |
| C  | -14.367751 | 2.179194  | -0.516532 |
| C  | -15.702594 | 1.825247  | -0.675674 |
| C  | -16.105338 | 0.490549  | -0.534441 |
| C  | -15.137568 | -0.479669 | -0.240959 |
| C  | -13.804150 | -0.119969 | -0.083130 |
| C  | -17.533351 | 0.096993  | -0.758918 |
| H  | -14.084881 | 3.222563  | -0.626368 |
| H  | -16.431021 | 2.596580  | -0.907645 |
| H  | -15.421688 | -1.522110 | -0.130837 |
| H  | -13.076350 | -0.892687 | 0.149107  |
| F  | -18.416290 | 1.089454  | -0.453753 |
| F  | -17.907733 | -0.993802 | -0.031639 |
| F  | -17.787825 | -0.232061 | -2.074408 |

**MeSsePhCF<sub>3</sub>**

E = -4.14174705  
G = -4.05477487  
N<sub>imag</sub> = not present.

|    |            |           |           |
|----|------------|-----------|-----------|
| Se | -9.595980  | 2.390644  | -1.923543 |
| C  | -9.728420  | 0.783829  | -3.008732 |
| C  | -9.543083  | -0.427462 | -2.330130 |
| C  | -9.641417  | -1.633604 | -3.016057 |
| C  | -9.925627  | -1.642340 | -4.385912 |
| C  | -10.102925 | -0.431143 | -5.060871 |
| C  | -10.008625 | 0.777283  | -4.375356 |
| C  | -9.980831  | -2.945191 | -5.139126 |
| H  | -9.322183  | -0.441865 | -1.265996 |
| H  | -9.496313  | -2.563166 | -2.475503 |
| H  | -10.321106 | -0.419535 | -6.123847 |
| H  | -10.159598 | 1.708798  | -4.910882 |
| F  | -10.807179 | -2.896234 | -6.218279 |
| F  | -10.403687 | -3.982827 | -4.367994 |
| F  | -8.747815  | -3.309806 | -5.622107 |
| S  | -9.805594  | 4.048772  | -3.336070 |
| C  | -8.112556  | 4.400109  | -3.912160 |
| H  | -8.216437  | 5.276030  | -4.560406 |
| H  | -7.459452  | 4.643715  | -3.073191 |
| H  | -7.710962  | 3.566545  | -4.489838 |

**TS: [PhSeSePh+SMe]<sup>-</sup>**

E = -6.28618592  
G = -6.12255558  
N<sub>imag</sub> = -38.513

|    |            |           |           |
|----|------------|-----------|-----------|
| Se | -11.266198 | 1.435970  | -0.003273 |
| C  | -13.162296 | 1.175485  | -0.312655 |
| C  | -14.014625 | 2.267830  | -0.519434 |
| C  | -15.385036 | 2.062515  | -0.681834 |
| C  | -15.915146 | 0.770929  | -0.628495 |
| C  | -15.067814 | -0.317503 | -0.415675 |
| C  | -13.693832 | -0.119375 | -0.262261 |
| H  | -13.611464 | 3.275944  | -0.551446 |
| H  | -16.040352 | 2.915355  | -0.842269 |
| H  | -16.983980 | 0.614831  | -0.750223 |
| H  | -15.472963 | -1.325698 | -0.372138 |
| H  | -13.039048 | -0.971134 | -0.102252 |
| Se | -10.373842 | 2.001703  | -2.164662 |
| C  | -10.104839 | 0.240619  | -2.938593 |
| C  | -8.978110  | -0.519001 | -2.601728 |
| C  | -8.780192  | -1.770791 | -3.185917 |
| C  | -9.699574  | -2.126797 | -4.112531 |
| C  | -10.820501 | -1.508675 | -4.452736 |
| C  | -11.026080 | -0.257790 | -3.867160 |
| H  | -8.256293  | -0.136530 | -1.886002 |
| H  | -7.902833  | -2.355451 | -2.919500 |
| H  | -9.541665  | -3.242150 | -4.568350 |

|   |            |           |           |
|---|------------|-----------|-----------|
| H | -11.539685 | -1.888865 | -5.174348 |
| H | -11.900923 | 0.327313  | -4.135099 |
| S | -8.690300  | 3.654646  | -4.872339 |
| C | -7.040319  | 3.183321  | -4.216672 |
| H | -6.921429  | 2.095093  | -4.199263 |
| H | -6.239336  | 3.601480  | -4.836241 |
| H | -6.903825  | 3.551806  | -3.194605 |

**TS: [MePhSeSePhMe+SMe]<sup>-</sup>**

E = -7.46196571

G = -7.24991238

Nimag = -36.306

|    |            |           |           |
|----|------------|-----------|-----------|
| Se | -11.021030 | 1.769760  | 0.169399  |
| C  | -12.914767 | 1.511060  | -0.134204 |
| C  | -13.779034 | 2.602893  | -0.289523 |
| C  | -15.148038 | 2.398308  | -0.446345 |
| C  | -15.699673 | 1.107285  | -0.445614 |
| C  | -14.824799 | 0.025349  | -0.281908 |
| C  | -13.450396 | 0.218253  | -0.132516 |
| H  | -13.385282 | 3.615464  | -0.283439 |
| H  | -15.800143 | 3.261625  | -0.562210 |
| H  | -15.219072 | -0.988524 | -0.270826 |
| H  | -12.798538 | -0.642062 | -0.009485 |
| C  | -17.179998 | 0.897357  | -0.633439 |
| H  | -17.457433 | 1.008594  | -1.689447 |
| H  | -17.487172 | -0.102080 | -0.315001 |
| H  | -17.761736 | 1.633907  | -0.070204 |
| Se | -10.116979 | 2.321057  | -2.005902 |
| C  | -9.846000  | 0.556913  | -2.763574 |
| C  | -8.717832  | -0.201329 | -2.429379 |
| C  | -8.519732  | -1.455964 | -3.002393 |
| C  | -9.431536  | -1.989436 | -3.926223 |
| C  | -10.551674 | -1.215081 | -4.257693 |
| C  | -10.762228 | 0.039928  | -3.685005 |
| H  | -7.989423  | 0.186015  | -1.722662 |
| H  | -7.634303  | -2.026662 | -2.729793 |
| H  | -11.274971 | -1.595261 | -4.975976 |
| H  | -11.640489 | 0.615363  | -3.963352 |
| C  | -9.221452  | -3.357630 | -4.521972 |
| H  | -8.162601  | -3.548069 | -4.721998 |
| H  | -9.564212  | -4.138387 | -3.830730 |
| H  | -9.777335  | -3.478795 | -5.455440 |
| S  | -8.542030  | 3.949204  | -4.688331 |
| C  | -6.854636  | 3.348277  | -4.282703 |
| H  | -6.813596  | 2.254500  | -4.301202 |
| H  | -6.121570  | 3.727133  | -5.003397 |
| H  | -6.548210  | 3.679109  | -3.284703 |

**TS: [MeOPhSeSePhOMe+SMe]<sup>-</sup>**

E = -7.90371500

G = -7.67950156

Nimag = -34.424

|    |            |           |           |
|----|------------|-----------|-----------|
| Se | -11.028534 | 1.761475  | 0.171099  |
| C  | -12.920157 | 1.516896  | -0.122094 |
| C  | -13.787926 | 2.617001  | -0.217485 |
| C  | -15.154749 | 2.430903  | -0.371531 |
| C  | -15.693785 | 1.133826  | -0.427543 |
| C  | -14.837388 | 0.029201  | -0.331069 |
| C  | -13.463182 | 0.229644  | -0.183489 |
| H  | -13.393922 | 3.628135  | -0.168551 |
| H  | -15.823229 | 3.284868  | -0.442748 |
| H  | -15.218950 | -0.984226 | -0.369181 |
| H  | -12.813744 | -0.638177 | -0.111972 |
| O  | -17.048186 | 1.062663  | -0.573107 |
| C  | -17.669102 | -0.229354 | -0.624421 |
| H  | -18.736243 | -0.035145 | -0.735745 |
| H  | -17.494130 | -0.789890 | 0.300059  |
| H  | -17.311474 | -0.807526 | -1.483099 |
| Se | -10.106739 | 2.308319  | -2.020293 |
| C  | -9.828407  | 0.548865  | -2.770530 |
| C  | -8.684547  | -0.198201 | -2.450919 |
| C  | -8.474769  | -1.449343 | -3.014255 |
| C  | -9.405259  | -1.984574 | -3.921490 |
| C  | -10.549094 | -1.244815 | -4.249701 |
| C  | -10.750721 | 0.010039  | -3.671113 |
| H  | -7.949906  | 0.198471  | -1.756195 |
| H  | -7.587303  | -2.025255 | -2.765380 |

|   |            |           |           |
|---|------------|-----------|-----------|
| H | -11.285861 | -1.626751 | -4.946386 |
| H | -11.642911 | 0.569699  | -3.936634 |
| O | -9.101841  | -3.217584 | -4.420492 |
| C | -10.002226 | -3.822986 | -5.358573 |
| H | -9.554116  | -4.783849 | -5.613382 |
| H | -10.100226 | -3.214030 | -6.263583 |
| H | -10.988822 | -3.987015 | -4.912192 |
| S | -8.612206  | 3.905101  | -4.646242 |
| C | -6.902848  | 3.333566  | -4.297044 |
| H | -6.833710  | 2.242963  | -4.361559 |
| H | -6.194838  | 3.761401  | -5.015331 |
| H | -6.586078  | 3.632047  | -3.292140 |

**TS: [ClPhSeSePhCl+SMe]<sup>-</sup>**

E = -6.16861627

G = -6.02428845

Nimag = -36.700

|    |            |           |           |
|----|------------|-----------|-----------|
| Se | -11.025786 | 1.809101  | 0.200728  |
| C  | -12.911908 | 1.514998  | -0.119581 |
| C  | -13.787175 | 2.588925  | -0.322502 |
| C  | -15.151671 | 2.367898  | -0.498688 |
| C  | -15.641062 | 1.061448  | -0.461119 |
| C  | -14.787191 | -0.020958 | -0.205016 |
| C  | -13.422057 | 0.211789  | -0.087696 |
| H  | -13.411115 | 3.607370  | -0.343415 |
| H  | -15.825659 | 3.203832  | -0.655807 |
| H  | -15.177066 | -1.033315 | -0.225994 |
| H  | -12.758038 | -0.633099 | 0.068043  |
| Cl | -17.351025 | 0.778497  | -0.674773 |
| Se | -10.136256 | 2.363481  | -1.965003 |
| C  | -9.869507  | 0.598895  | -2.724480 |
| C  | -8.751316  | -0.167407 | -2.377538 |
| C  | -8.552094  | -1.426674 | -2.940462 |
| C  | -9.478479  | -1.914056 | -3.862940 |
| C  | -10.595280 | -1.162845 | -4.227065 |
| C  | -10.786465 | 0.093367  | -3.652245 |
| H  | -8.026041  | 0.211055  | -1.663652 |
| H  | -7.683520  | -2.017334 | -2.667704 |
| H  | -11.309498 | -1.550247 | -4.946371 |
| H  | -11.657881 | 0.675404  | -3.936101 |
| Cl | -9.234554  | -3.490577 | -4.573845 |
| S  | -8.473458  | 4.039481  | -4.702496 |
| C  | -6.851954  | 3.250513  | -4.352678 |
| H  | -6.912140  | 2.163560  | -4.467176 |
| H  | -6.081185  | 3.621106  | -5.037435 |
| H  | -6.524628  | 3.462563  | -3.329414 |

**TS: [CF<sub>3</sub>PhSeSePhCF<sub>3</sub>+SMe]<sup>-</sup>**

E = -7.54814325

G = -7.37879441

Nimag = -38.402

|    |            |           |           |
|----|------------|-----------|-----------|
| Se | -11.032635 | 1.682666  | 0.173014  |
| C  | -12.933963 | 1.414902  | -0.100076 |
| C  | -13.653306 | 1.906209  | -1.190357 |
| C  | -15.026316 | 1.685217  | -1.281113 |
| C  | -15.693748 | 0.976474  | -0.280048 |
| C  | -14.973888 | 0.489457  | 0.817836  |
| C  | -13.603037 | 0.701409  | 0.905362  |
| H  | -13.150868 | 2.462035  | -1.975070 |
| H  | -15.568362 | 2.072808  | -2.136886 |
| H  | -15.474784 | -0.065899 | 1.605106  |
| H  | -13.060031 | 0.303821  | 1.758490  |
| C  | -17.178167 | 0.732390  | -0.347053 |
| F  | -17.740252 | 1.151691  | -1.507488 |
| F  | -17.489367 | -0.593316 | -0.218865 |
| F  | -17.849685 | 1.370734  | 0.662615  |
| Se | -10.141699 | 2.381350  | -1.910759 |
| C  | -9.888573  | 0.724600  | -2.806569 |
| C  | -8.992210  | -0.278946 | -2.312187 |
| C  | -8.793531  | -1.475997 | -2.995668 |
| C  | -9.478375  | -1.721134 | -4.189004 |
| C  | -10.371730 | -0.768749 | -4.688242 |
| C  | -10.578747 | 0.422459  | -3.996923 |
| H  | -8.442401  | -0.093635 | -1.395026 |
| H  | -8.094914  | -2.205151 | -2.600070 |
| H  | -10.912451 | -0.948558 | -5.611977 |
| H  | -11.276733 | 1.152801  | -4.393084 |

|   |            |           |           |
|---|------------|-----------|-----------|
| C | -9.298355  | -3.024980 | -4.927715 |
| F | -8.169640  | -3.687668 | -4.571596 |
| F | -10.340730 | -3.884969 | -4.696830 |
| F | -9.244026  | -2.852693 | -6.277882 |
| S | -8.125589  | 4.171218  | -4.514692 |
| C | -6.661458  | 3.142567  | -4.096666 |
| H | -6.863860  | 2.081486  | -4.273926 |
| H | -5.795773  | 3.428123  | -4.704376 |
| H | -6.386305  | 3.259693  | -3.043125 |
